# Supplementary material for: Metal–organic replica of γ-Pu: the first uninodal 10-connected coordination network based on pentanuclear cadmium clusters
Source: Royal Society of Chemistry journal article supplement (doi:10.1039/b815629h), 2008-11-14
Supplement: b815629h.pdf [file b815629h.pdf]

## Supporting Information

**Metal-organic replica of  $\gamma$ -Pu: the first uninodal 10-connected coordination network based on pentanuclear cadmium clusters**

**Xin-Long Wang, Chao Qin, Ya-Qian Lan, Kui-Zhan Shao, Zhong-Min Su\*, and**

**En-Bo Wang\***

*Institute of Functional Materials, Department of Chemistry, Key Laboratory of Polyoxometalates Science of Ministry of Education, Northeast Normal University, Changchun, 130024, China.*

Mineral topologies that have been imitated in MOFs are listed below:

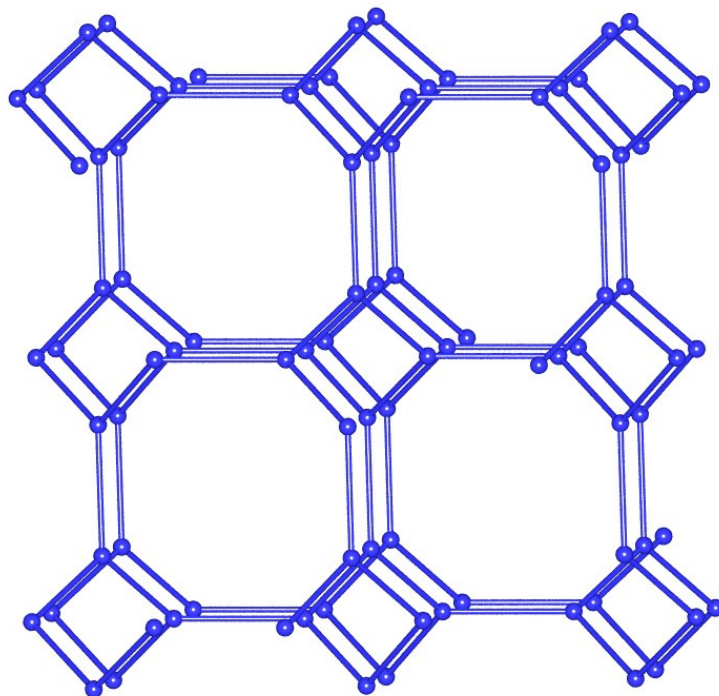

**SrSi<sub>2</sub>**

*J. Am. Chem. Soc.* 1997, 119, 2861 – 2868;

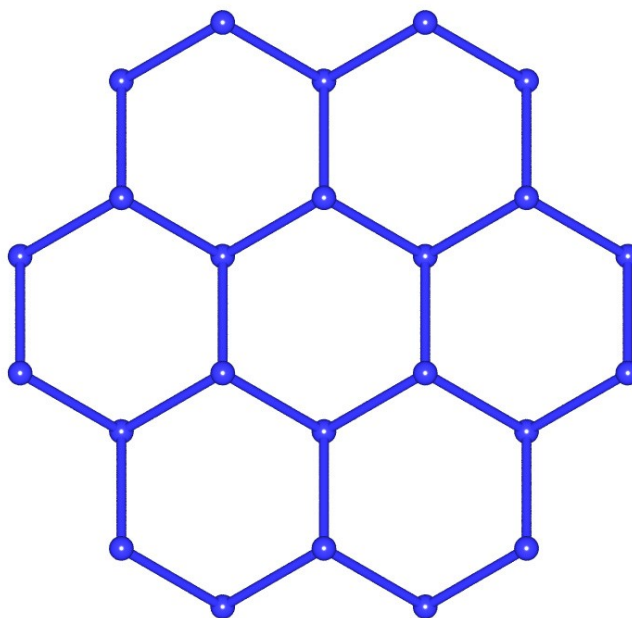

**Perovskite**

*Angew. Chem. Int. Ed.* 2000, 39, 2699 – 2701

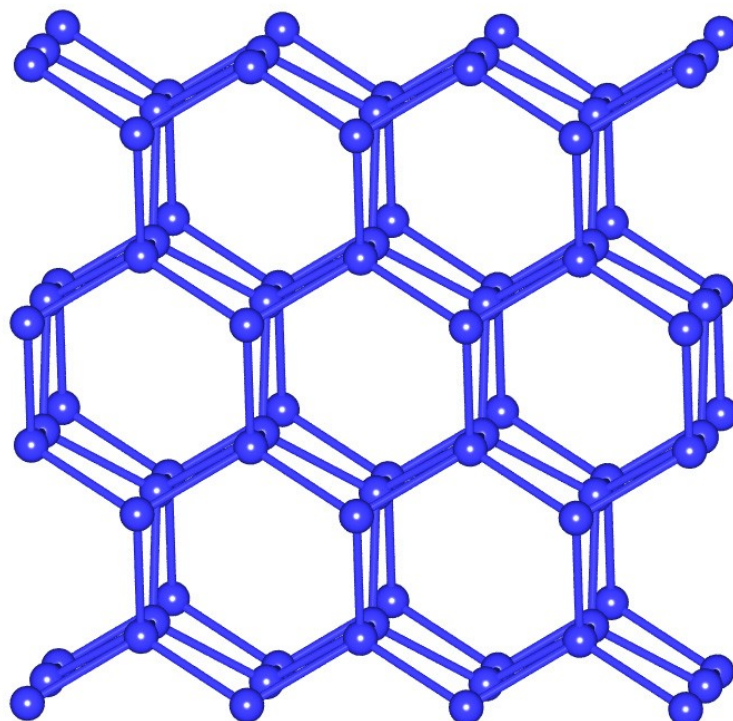

**Diamond**

*Dalton Trans.* 2000, 3735 – 3744

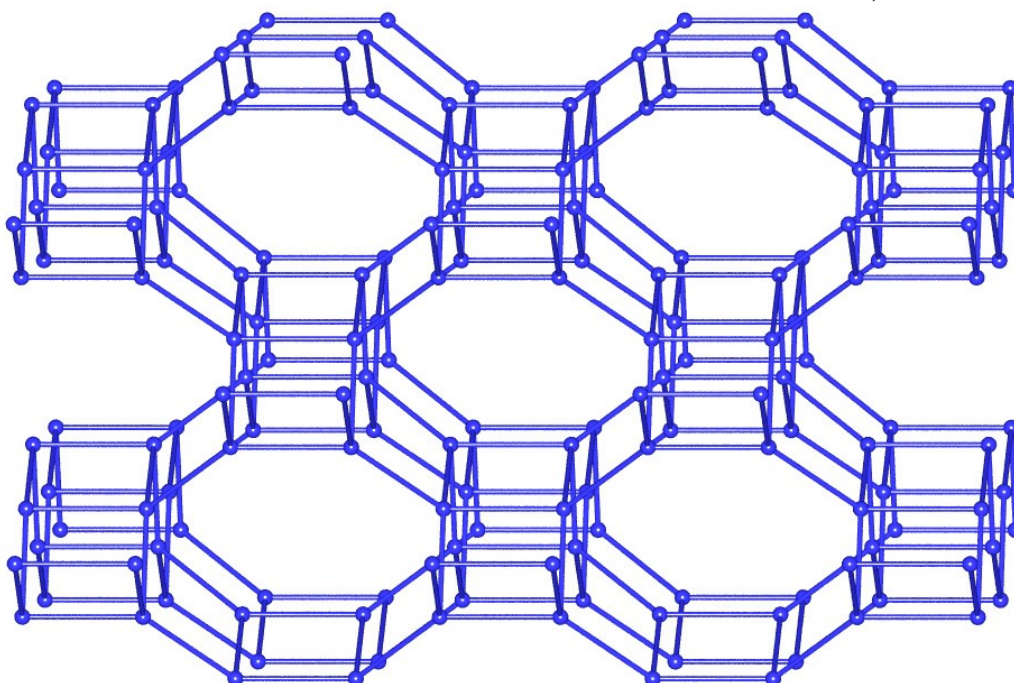

**Feldspar**

*Angew. Chem. Int. Ed. Engl.* 1997, 36, 247 – 248

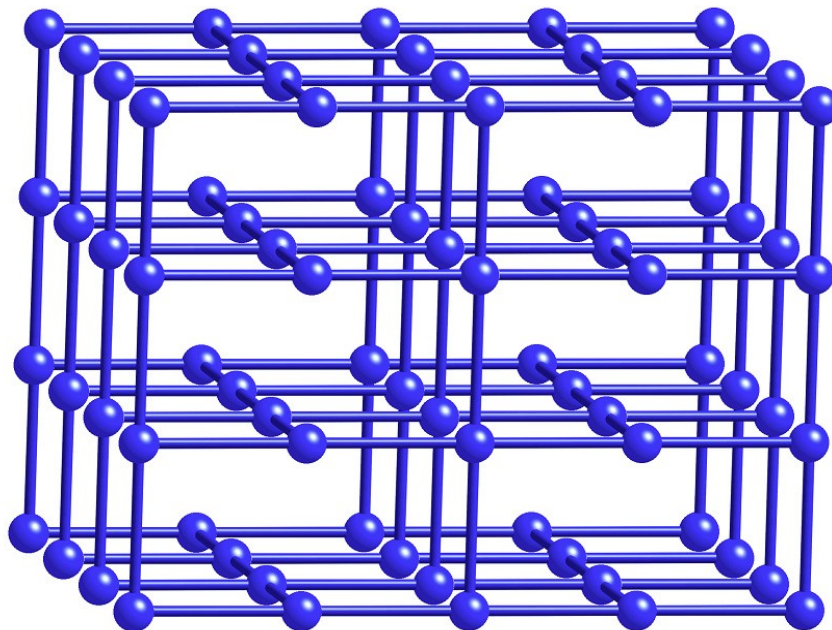

**CdSO<sub>4</sub>**  
*Proc. Natl. Acad. Sci. USA* 2002, 99, 4900 – 4904

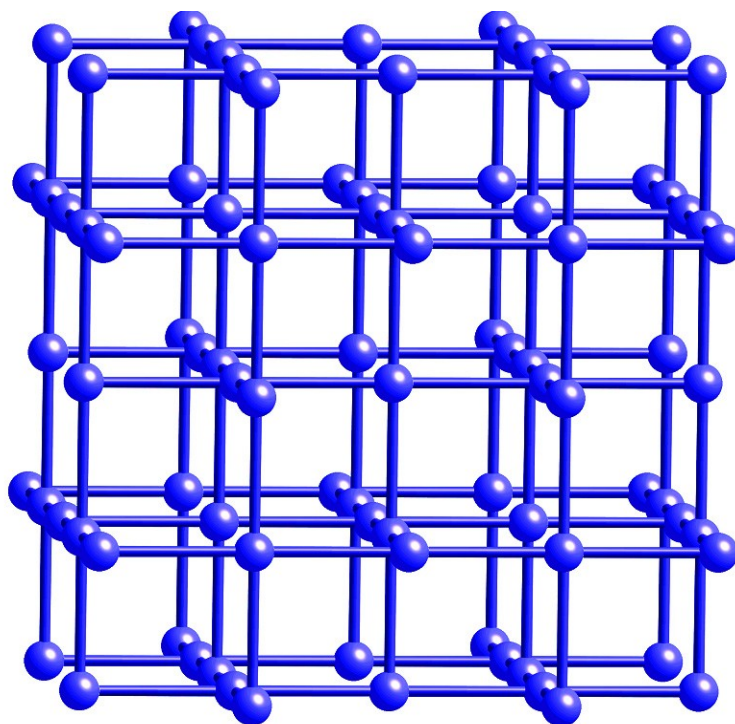

**NbO**  
*J. Am. Chem. Soc.* 2002, 124, 376 – 377

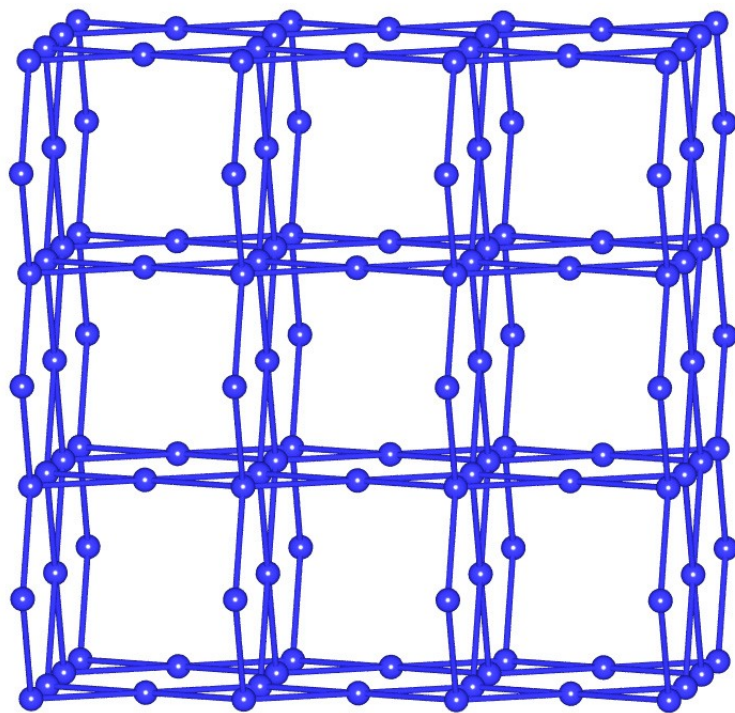

**PtS**  
*J. Chem. Soc. Chem. Commun.* 1990, 762 – 763

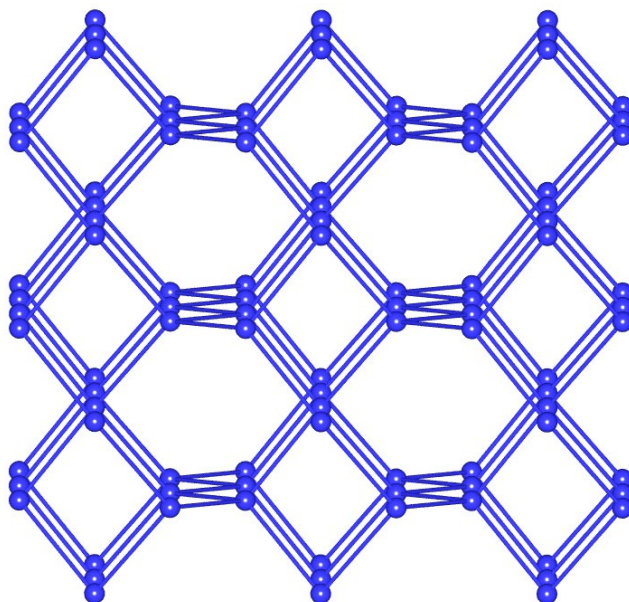

**Quartz**  
*Angew. Chem. Int. Ed. Engl.* 1995, 34, 1203 – 1204



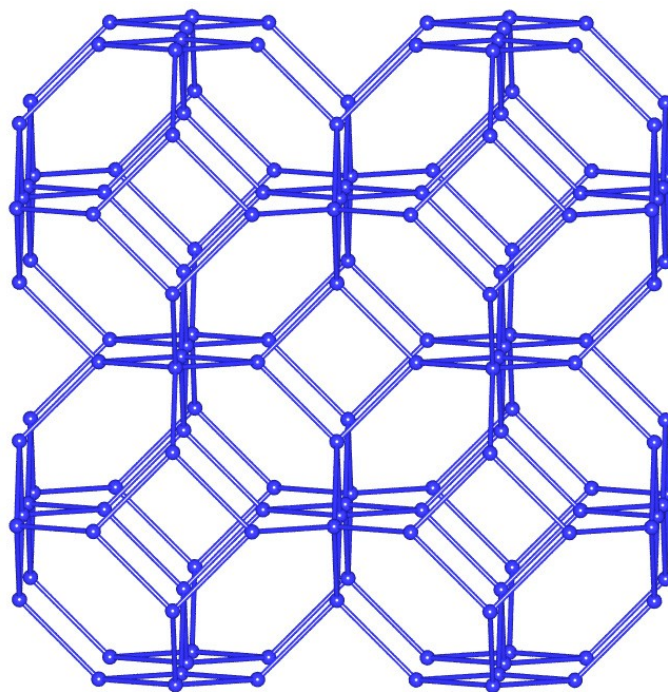

**Sodalite**

*Angew. Chem. Int. Ed.* 2003, 42, 1111 – 1115

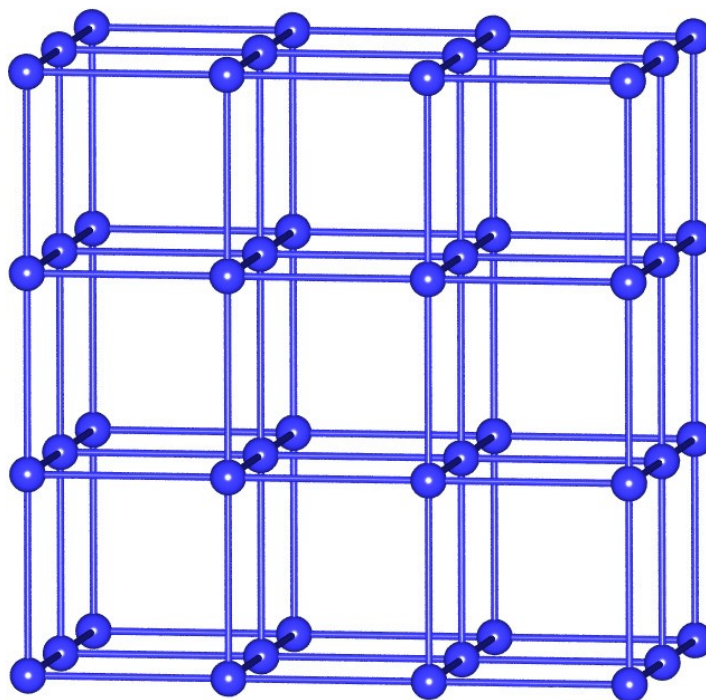

**$\alpha$ -Po**

*Angew. Chem. Int. Ed. Engl.* 1997, 36, 2752 – 2755

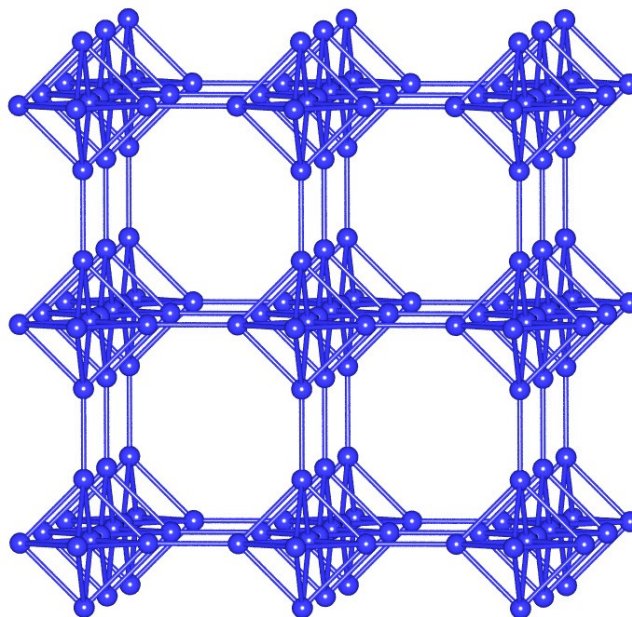

**CaB<sub>6</sub>**

*J. Am. Chem. Soc.* 2001, 123, 8239 – 8247

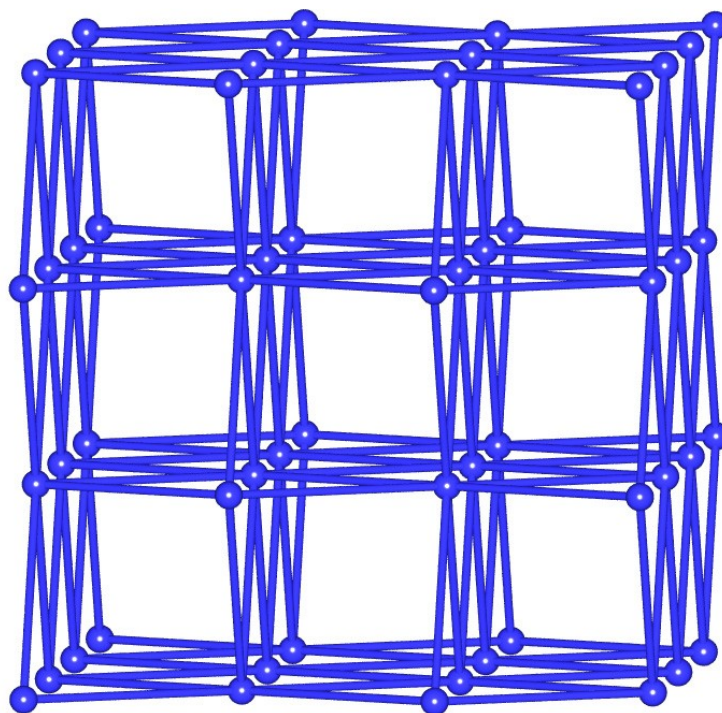

**CsCl**

*Acc. Chem. Res.*, 2005, 38, 176.

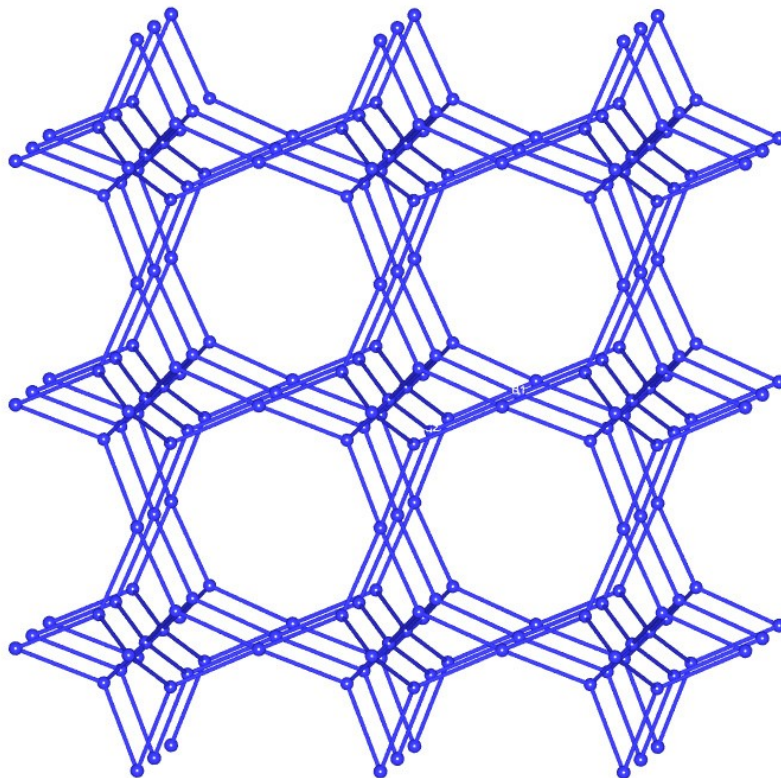

**Brocite**

*Angew. Chem. Int. Ed. Engl.* 1996, 35, 1690 – 1692

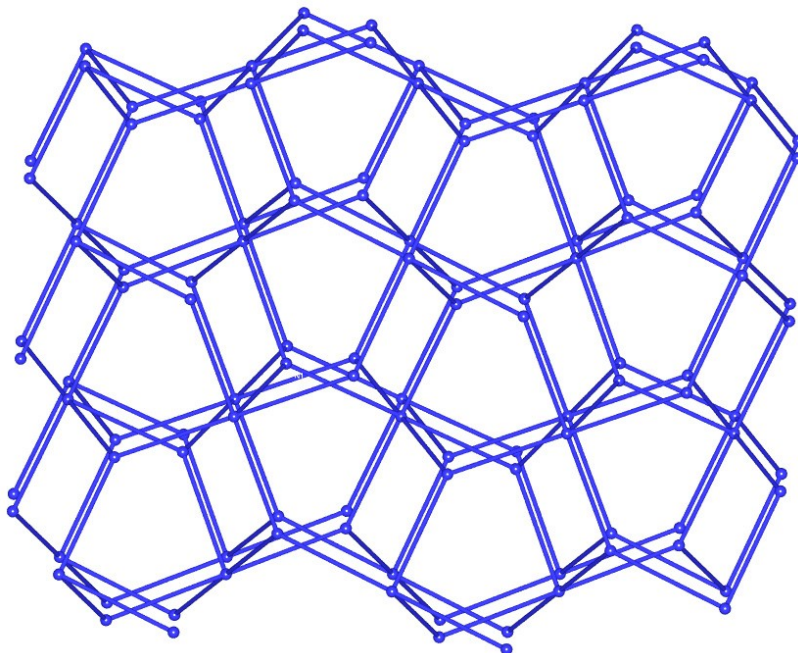

**Pyrite**

*Angew. Chem. Int. Ed.* 2003, 42, 3907 – 3909



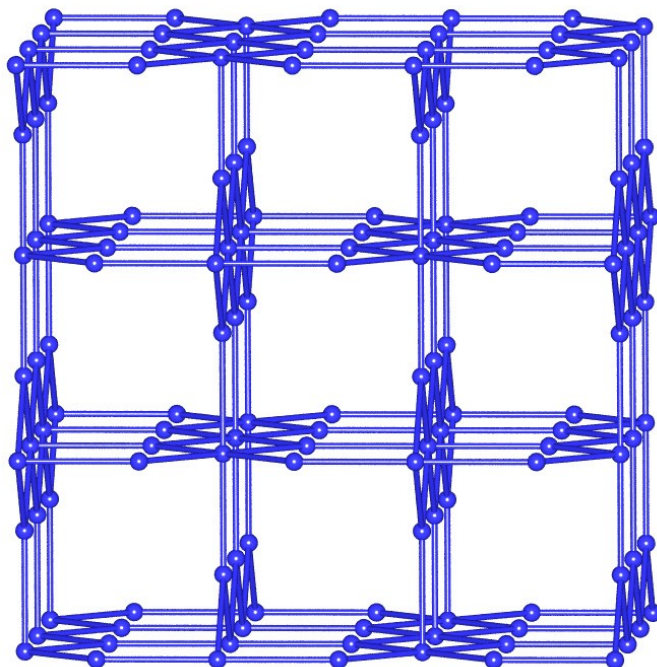

**Rutile**  
*J. Chem. Soc. Chem. Commun.* 1991, 445 – 447

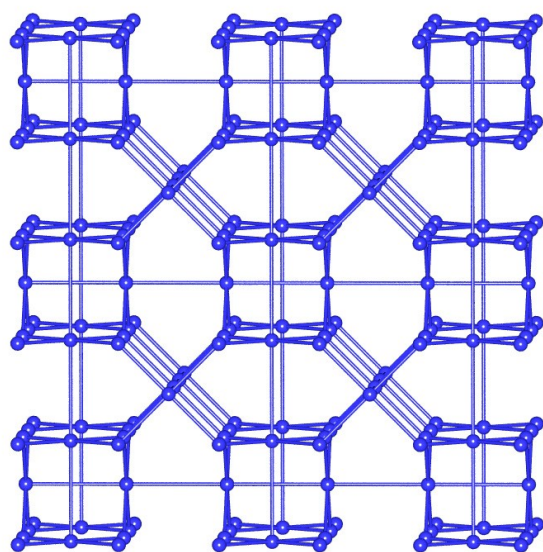

**Pt<sub>3</sub>O<sub>4</sub>**  
*Inorg. Chem.* 1995, 34, 757 – 758

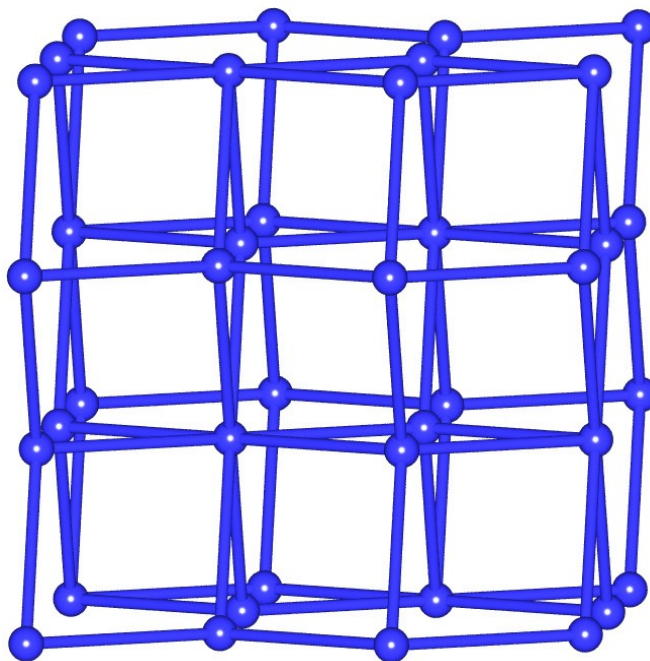

**CaF<sub>2</sub>**

*Angew. Chem. Int. Ed.* 2004, 43, 971 –971

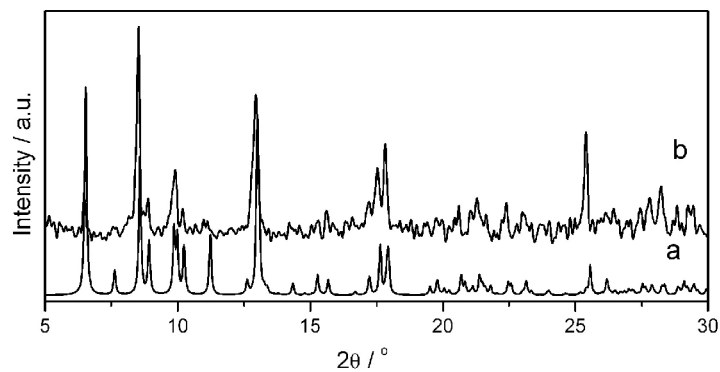

**Fig. S1** PXRD patterns for **1**: a) simulated from single-crystal X-ray diffraction data and b) as-synthesized solids.

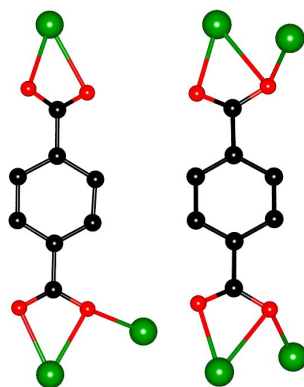

**Fig. S2** Carboxylate binding modes in **1**. Color code: C black; O red; Cd green.

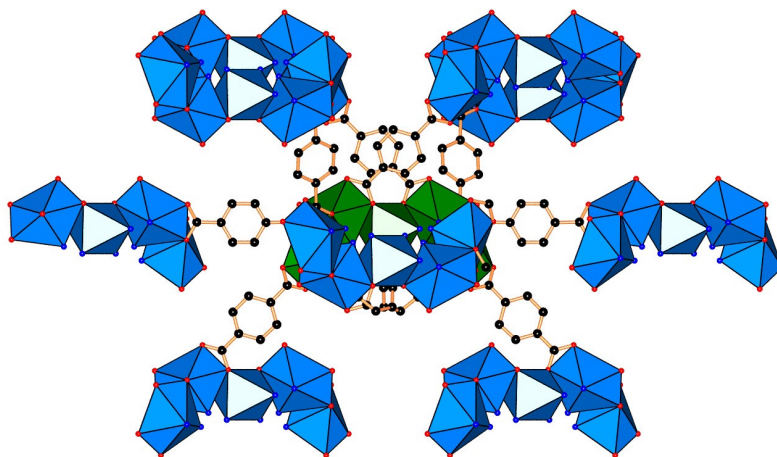

**Fig. S3** View of the linkages of a pentacadmium core (green) with ten adjacent cores (blue).

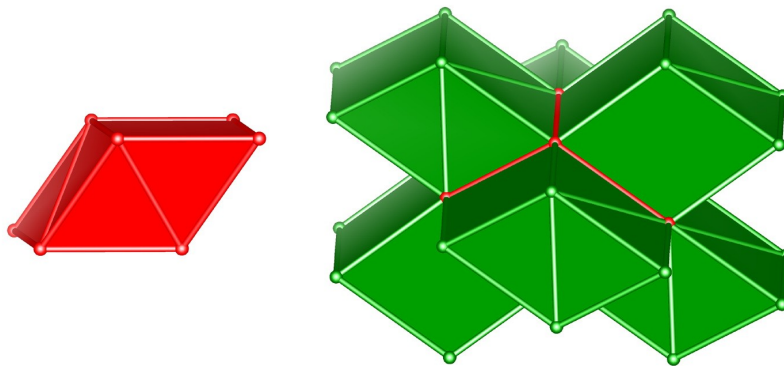

**Fig. S4** The primitive cubic (**pcu**) packing of the 3D framework when each cage as a supramolecular building block is considered as a 6-connected node.

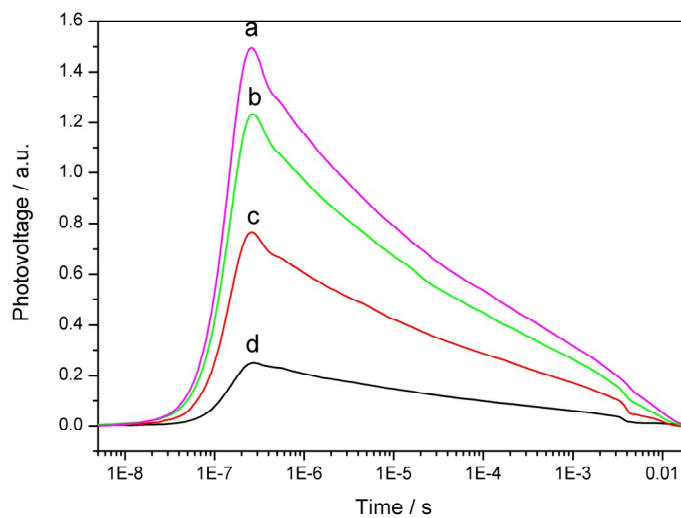

**Fig. S5** The transient PV response of the ITO/compound **1**/ITO sandwich cell under illumination of 355 nm pulse laser at various intensities. From curves **a** to **d**, the corresponding light intensities are 0.05, 0.1, 0.2 and 0.3 mJ.
